# Supplementary material for: no polesencodes a predicted E3 ubiquitin ligase required for early embryonic development ofDrosophila
Source: Oxford University Press journal article supplement (doi:10.1242/dev.027599), 2009-01-13
Supplement: dev027599-sup-027599-tables1.pdf [file dev027599-sup-027599-tables1.pdf]

**Table S1. Survival of *nopo* larvae after hydroxyurea treatment or irradiation**

| Genotype                                                     | Percentage homozygotes* |          | Percentage eclosion† |          |
|--------------------------------------------------------------|-------------------------|----------|----------------------|----------|
|                                                              | -HU                     | +HU      | 0 Gray               | 10 Gray  |
| <i>mei-41</i> <sup>RT1</sup>                                 | 62 (557)                | 3 (235)  | 82 (170)             | 3 (177)  |
| <i>nopo</i> <sup>Z1447</sup>                                 | 34 (562)                | 35 (587) | 86 (107)             | 87 (112) |
| <i>nopo</i> <sup>Exc142</sup>                                | nd                      | nd       | 92 (149)             | 88 (129) |
| <i>nopo</i> <sup>Z1447</sup> / <i>Df(2R)Exel7153</i>         | nd                      | nd       | 98 (124)             | 89 (128) |
| <i>nopo</i> <sup>Exc142</sup> / <i>Df(2R)Exel7153</i>        | 35 (440)                | 31 (397) | 92 (210)             | 97 (167) |
| <i>nopo</i> <sup>Z1447</sup> / <i>nopo</i> <sup>Exc142</sup> | nd                      | nd       | 99 (147)             | 99 (192) |

\*Sensitivity to hydroxyurea (HU). First instar larvae were grown on food minus or plus HU and allowed to develop. For each genotype, the ratio of homozygous mutant to total progeny is expressed as a percentage with total number of adult flies scored shown in parentheses. Expected percentages (based on Mendelian ratios) were 50% and 33% for *mei-41* and *nopo*, respectively.

†Sensitivity to irradiation. Third instar larvae were untreated or exposed to low-dose irradiation and allowed to develop. For each genotype, the ratio of eclosed adults to total pupae is expressed as a percentage with total pupae shown in parentheses.

nd, not determined.
